# Supplementary material
Source: publisher site journal article supplement (https://cdn.bio-protocol.org/journal/static/2305281_Supplementary%20information.zip)
Supplement: Supplementary file 1 [file 2305281_Supplementary%20information.zip]

## Sheet: RNA quant data import
Supplementary Table 2: Dilution calculator for dilution of sample fraction prior to the clarification step.
Instructions: export UV-spectrophotometric data as a txt file, copy and past into column A. Example data included below.
Sample ID	User ID	Date	Time	ng/ul	A260	A280	260/280	260/230	Constant	Cursor Pos.	Cursor abs.	340 raw
HCT116_CL_R1_Input_R1	Default	n/a	n/a	229.06	5.726	3.415	1.68	0.81	40	230	7.089	0.767
HCT116_CL_R1_Input_R1	Default	n/a	n/a	230.23	5.756	3.472	1.66	0.8	40	230	7.195	0.129
HCT116_CL_R1_Input_R2	Default	n/a	n/a	231.73	5.793	3.481	1.66	0.8	40	230	7.255	0.112
HCT116_CL_R1_Input_R2	Default	n/a	n/a	231.88	5.797	3.452	1.68	0.81	40	230	7.201	0.191
HCT116_CL_R1_RNP_R3	Default	n/a	n/a	927.05	23.176	11.068	2.09	2.14	40	230	10.828	0.037
HCT116_CL_R1_RNP_R3	Default	n/a	n/a	906.36	22.659	10.802	2.1	2.15	40	230	10.548	0.156
HCT116_CL_R1_RNP_R4	Default	n/a	n/a	905.03	22.626	10.837	2.09	2.16	40	230	10.47	0.066
HCT116_CL_R1_RNP_R4	Default	n/a	n/a	897.2	22.43	10.748	2.09	2.16	40	230	10.365	0.211

## Sheet: Analysis
Supplementary Table 2: Dilution calculator for dilution of sample fraction prior to the clarification step.
Instructions: copy and paste txt file of UV-spectrophotometric data into "RNA quant data import" tab. Add sample information under yellow highlighted column headers. Choose desired dilution settings and proceed to "data export tab". Note: Estimated protein yield for input samples are calculated using UV-spectrophotometric data (if applicable) before being calculated based on compositional analysi…
Example data is shown below. Representative UV-spectrophotometric profiles of different fractions shown to the right.
Sample information.								Composition of undiluted sample suspension.		Dilution settings.				Estimated composition of diluted sample suspension.
Sample suspension ID. Note: Both undiluted sample suspension and sample suspension used for UV-spectrophotometric analysis contain the same ID.	Volume of undiluted starting AGP input suspension (µL).	Volume of undiluted starting AGP input suspension used for sample prep (µL).	Sample fraction (input: "I"; or RNP: "R").	Undiluted sample suspension volume (µL).	Dilution factor used for UV-spectrophotometric analysis (0-1).	Volume of undiluted sample suspension remaining and/or used for dilution (µL). Enter even if not diluting.	Estimated protein yield (µg) based on compositional analysis of undiluted AGP input suspension (Supplementary Table 1).	Estimated RNA concentration of undiluted sample suspension (µg/µL).	Estimated protein concentration of undiluted input samples (µg/µL).	Desired RNA (RNP) or protein (input) concentration of diluted sample suspension (µg/µL). Leave blank for default settings: 4.0 µg of RNA/µL (RNP) or 5 µg of protein/µL (input).	Microliters of 1% LiDS TE to add to the indicated volume of the undiluted sample suspension for the desired concentration of RNA/µL (RNP) or protein/µL (input).	Volume of sample suspension after dilution (µL).	Volume of sample suspension after dilution and clarification (µL).	% fraction/µL.	Estimated µg of protein/µL.	Estimated µg of RNA/µL.
HCT116_CL_R1_RNP_R3	13000	378.325	R	32	0.2	30		4.58352	n/a		4.37644	34.3764	30.9388	0.0793656	n/a	4					Input sample isolated from an AGP input suspension containing non-crosslinked HeLa cells by 95% MeOH v/v precipitation.									Input sample isolated from an AGP input suspension containing UV-crosslinked (0.4 J/cm2, 254 nm) HeLa cells by 95% MeOH v/v precipitation.
HCT116_CL_R1_RNP_R4	13000	378.325	R	32	0.2	30		4.50557	n/a		3.79181	33.7918	30.4126	0.0807387	n/a	4
HCT116_CL_R1_Input_R1	13000	47.2906	I	32	0.2	30	237.473	1.14822	5.74112		4.44675	34.4467	31.0021	0.00990045	5	n/a
HCT116_CL_R1_Input_R2	13000	47.2906	I	32	0.2	30	237.473	1.15902	5.79512		4.77075	34.7707	31.2937	0.00980819	5	n/a
																					RNP fraction isolated from an AGP input suspension containing non-crosslinked HeLa cells by LEAP-RBP without DNA depletion step.									RNP fraction isolated from an AGP input suspension containing UV-crosslinked (0.4 J/cm2, 254 nm) HeLa cells by LEAP-RBP without DNA depletion step.
																					RNP fraction isolated from an AGP input suspension containing non-crosslinked HeLa cells by LEAP-RBP and DNA depletion step.									RNP fraction isolated from an AGP input suspension containing UV-crosslinked (0.4 J/cm2, 254 nm) HeLa cells by LEAP-RBP and DNA depletion step.
																					Performing LEAP-RBP on the final AGPC interphase suspension of non-crosslinked samples yields no detectable pellet/protein.									clRNP fraction isolated from the final AGPC interphase suspension of UV-crosslinked (0.4 J/cm2, 254 nm) HeLa cells by LEAP-RBP without DNA depletion step.
																					Performing LEAP-RBP on the final AGPC interphase suspension of non-crosslinked samples yields no detectable pellet/protein.									clRNP fraction isolated from the final AGPC interphase suspension of UV-crosslinked (0.4 J/cm2, 254 nm) HeLa cells by LEAP-RBP and DNA depletion step.

## Sheet: Data export
Supplementary Table 2: Dilution calculator for dilution of sample fraction prior to the clarification step.
Instructions: Enter sample information under yellow highlited column headers. Use values generated under green highlighted column headers for analyzing RNA (UV-spectrophotometry) and/or protein (BCA) quantitation data in Supplementary Table 3. Recommended clarified sample dilutions for RNA (UV-spectrophotometry) and protein (BCA) quantitation are shown below but are not strictly necessary for sam…
Sample information.						UV-spectrophotometry	BCA
Sample suspension ID.	% fraction/µL of clarified sample suspension.	Estimated protein concentration of clarified sample suspension (µg/µL).	Estimated RNA concentration of clarified sample suspension (µg/µL).	Sample fraction (input: "I"; or RNP: "R").	Expected RNP fraction composition (µg protein/µg RNA).	Recommended diution factor (0-1).	Recommended diution factor (0-1).	Recommended volume per well (µL).
HCT116_CL_R1_RNP_R3	0.0793656	n/a	4	R	0.125	0.2	0.5	2
HCT116_CL_R1_RNP_R4	0.0807387	n/a	4	R	0.125	0.2	0.5	2
HCT116_CL_R1_Input_R1	0.00990045	5	n/a	I		n/a	0.1	4
HCT116_CL_R1_Input_R2	0.00980819	5	n/a	I		n/a	0.1	4
